# Supplementary material
Source: Springer Nature journal article supplement (https://www.springermedizin.de/resource/supplementary/12911_2007_191_MOESM1_ESM.pdf/9527336)

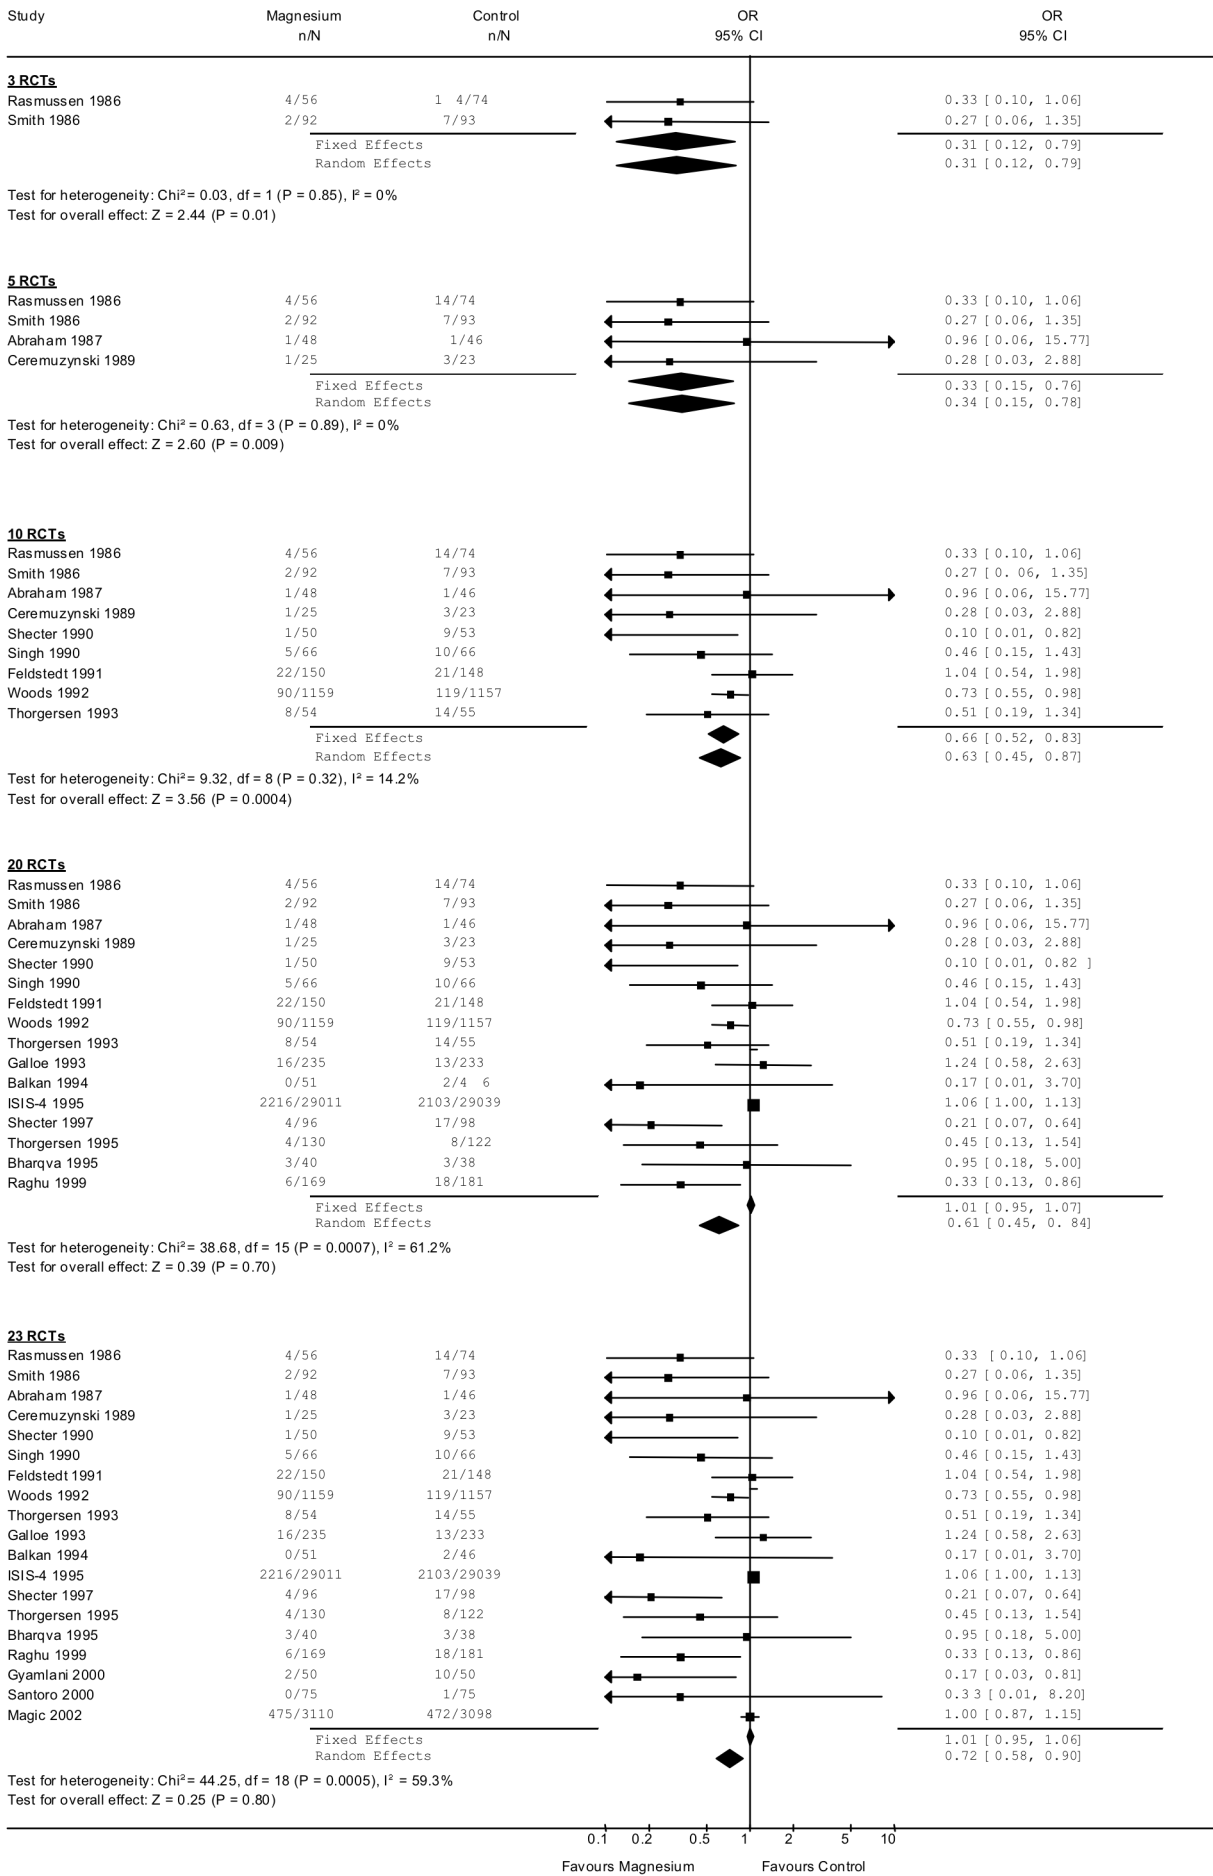

Favours Magnesium Favours Control

Supplement: MOESM1 [file 9527336]
